# Supplementary material for: Unraveling the enigma of Craig-type Möbius-aromatic osmium compounds
Source: Royal Society of Chemistry journal article supplement (doi:10.1039/d4dt01110d), 2024-01-01
Supplement: d4dt01110d1.pdf [file d4dt01110d1.pdf]

# Journal Name

ARTICLE TYPE

Cite this: DOI: 00.0000/xxxxxxxxxx

## Supplementary Information

### Unraveling the Enigma of Craig-Type Möbius-Aromatic Osmium Compounds

Antonia Rabe, Qian Wang and Dage Sundholm

Received Date

Accepted Date

DOI: 00.0000/xxxxxxxxxx

## S1 Bond lengths

Table S1 Bond lengths (in pm) of 1-4 are calculated at the density functional theory (DFT) level using the  $\omega$ B97X-D functional<sup>S1</sup>, def2-TZVP<sup>S2</sup> basis sets and an effective core potential (ECP) on Os<sup>S3,S4</sup> to consider relativistic effects. The bond lengths are compared to experimental values.<sup>S5,S6,S7</sup>

| Molecule | 1                                 | 2                                 | 3                                 | 4                                 |
|----------|-----------------------------------|-----------------------------------|-----------------------------------|-----------------------------------|
| Bond     | bond length (exp. <sup>S5</sup> ) | bond length (exp. <sup>S5</sup> ) | bond length (exp. <sup>S6</sup> ) | bond length (exp. <sup>S7</sup> ) |
| Os - C1  | 199.94 (200.2)                    | 182.23 (186.5)                    | 206.22 (201.5)                    | 203.73 (203.4)                    |
| C1 - C2  | 136.75 (137.2)                    | 139.19 (137.3)                    | 137.34 (140.1)                    | 137.61 (134.4)                    |
| C2 - C3  | 142.19 (140.8)                    | 142.17 (139.4)                    | 143.36 (142.7)                    | 145.32 (145.4)                    |
| C3 - C4  | 136.70 (137.7)                    | 138.23 (140.2)                    | 136.32 (134.9)                    | 135.33 (134.7)                    |
| C4 - C5  | 141.65 (138.6)                    | 139.86 (138.6)                    | 143.57 (142.1)                    | 145.23 (144.2)                    |
| C4 - Os  | 213.21 (214.9)                    | 209.56 (208.7)                    | 209.21 (208.9)                    | 208.08 (210.2)                    |
| C5 - C6  | 138.21 (138.9)                    | 138.73 (141.0)                    | 137.19 (138.2)                    | 134.98 (134.6)                    |
| C6 - C7  | 138.37 (138.7)                    | 140.12 (139.3)                    | 141.24 (143.9)                    | 142.79 (142.2)                    |
| C7 - Os  | 194.76 (194.3)                    | 206.99 (211.3)                    | 180.03 (177.7)                    | 206.95 (208.4)                    |
| C7 - C8  | -                                 | -                                 | -                                 | 128.33 (130.7)                    |
| C8 - Os  | -                                 | -                                 | -                                 | 223.26 (232.3)                    |

## S2 NMR chemical shift values

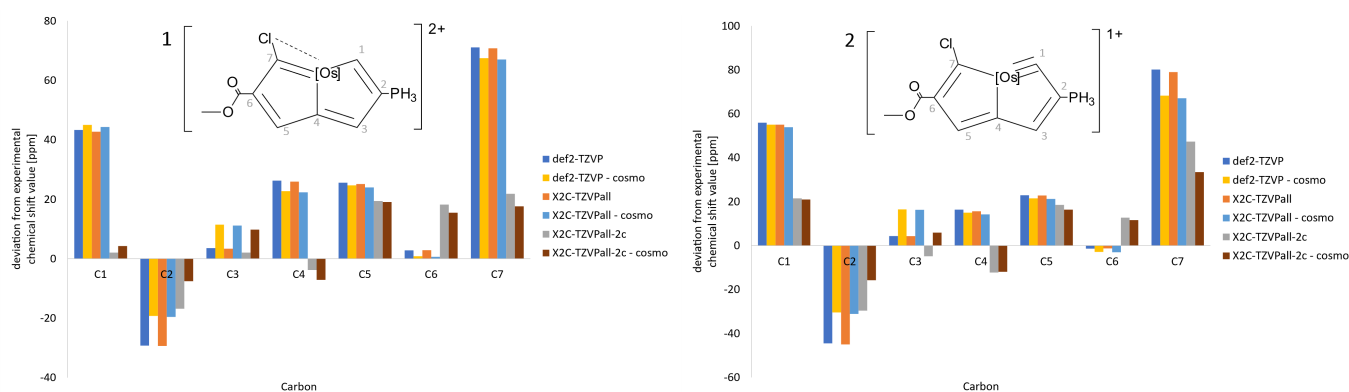

Fig. S1 The deviations of the <sup>13</sup>C NMR chemical shift values of 1 and 2 calculated at different levels of theory from experimental values.

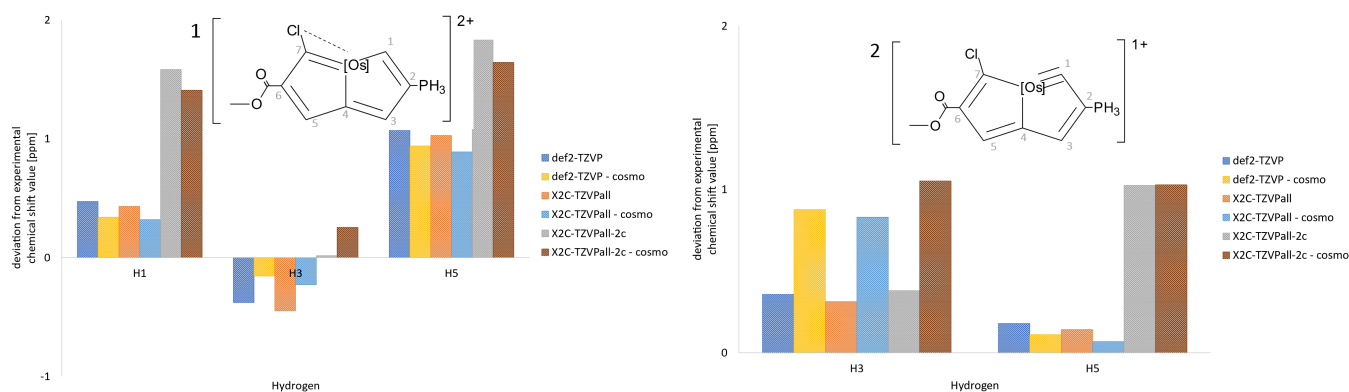

Fig. S2 The deviations of the <sup>1</sup>H NMR chemical shift values of 1 and 2 calculated at different levels of theory from experimental data.

Table S2 <sup>13</sup>C NMR chemical shift values (in ppm) of **1** calculated at the DFT level using the ωB97X-D functional<sup>S1,S8</sup> and different Hamiltonians<sup>S9,S10,S4</sup> and basis sets<sup>S2,S11</sup>. The experimental values are taken from Ref. S5.

| <b>1</b>           | ECP<br>def2-TZVP | ECP<br>def2-QZVP | X2C<br>dyall-vdz(Os)/<br>x2c-SVPall | X2C<br>x2c-SVPall | X2C<br>x2c-TZVPall | SO-X2C<br>x2c-SVPall-2c | SO-X2C<br>x2c-TZVPall-2c | Exp.  |
|--------------------|------------------|------------------|-------------------------------------|-------------------|--------------------|-------------------------|--------------------------|-------|
| C1                 | 269.73           | 273.84           | 262.72                              | 253.42            | 268.98             | 195.40                  | 228.50                   | 226.4 |
| C2                 | 109.48           | 111.05           | 105.23                              | 102.28            | 109.25             | 119.24                  | 121.90                   | 138.7 |
| C3                 | 166.38           | 168.93           | 161.65                              | 158.18            | 166.03             | 155.12                  | 164.85                   | 162.8 |
| C4                 | 214.95           | 217.50           | 205.76                              | 202.53            | 214.47             | 163.34                  | 184.90                   | 188.7 |
| C5                 | 190.77           | 193.57           | 189.31                              | 181.93            | 190.18             | 169.07                  | 184.60                   | 165.2 |
| C6                 | 152.93           | 155.46           | 148.41                              | 146.00            | 152.81             | 167.54                  | 168.33                   | 150.1 |
| C7                 | 297.47           | 301.59           | 293.67                              | 281.83            | 297.04             | 208.26                  | 248.23                   | 224.6 |
| COOCH <sub>3</sub> | 162.16           | 165.36           | 153.24                              | 153.29            | 162.18             | 150.80                  | 160.49                   | 157.7 |
| COOCH <sub>3</sub> | 60.03            | 60.87            | 56.65                               | 56.44             | 59.94              | 56.52                   | 59.93                    | 52.8  |

Table S3 <sup>1</sup>H NMR chemical shift values (in ppm) of **1** calculated at the DFT level using the ωB97X-D functional<sup>S1,S8</sup> and different Hamiltonians<sup>S9,S10,S4</sup> and basis sets<sup>S2,S11</sup>. The experimental values are taken from Ref. S5.

| <b>1</b> | ECP<br>def2-TZVP | ECP<br>def2-QZVP | X2C<br>dyall-vdz(Os)/<br>x2c-SVPall | X2C<br>x2c-SVPall | X2C<br>x2c-TZVPall | SO-X2C<br>x2c-SVPall-2c | SO-X2C<br>x2c-TZVPall-2c | Exp.  |
|----------|------------------|------------------|-------------------------------------|-------------------|--------------------|-------------------------|--------------------------|-------|
| H1       | 14.07            | 14.21            | 14.05                               | 13.70             | 14.03              | 14.85                   | 15.18                    | 13.60 |
| H3       | 9.16             | 9.18             | 8.76                                | 8.62              | 9.09               | 9.12                    | 9.56                     | 9.54  |
| H5       | 10.01            | 10.03            | 9.85                                | 9.63              | 9.97               | 10.56                   | 10.77                    | 8.94  |

Table S4 <sup>13</sup>C NMR chemical shift values (in ppm) of **2** calculated at the DFT level using the ωB97X-D functional<sup>S1,S8</sup> and different Hamiltonians<sup>S9,S10,S4</sup> and basis sets<sup>S2,S11</sup>. The experimental values are taken from Ref. S5.

| <b>2</b>           | ECP<br>def2-TZVP | ECP<br>def2-QZVP | X2C<br>dyall-vdz(Os)/<br>x2c-SVPall | X2C<br>x2c-SVPall | X2C<br>x2c-TZVPall | SO-X2C<br>x2c-SVPall-2c | SO-X2C<br>x2c-TZVPall-2c | Exp.  |
|--------------------|------------------|------------------|-------------------------------------|-------------------|--------------------|-------------------------|--------------------------|-------|
| C1                 | 381.27           | 386.17           | 380.91                              | 361.47            | 380.27             | 282.05                  | 346.85                   | 325.3 |
| C2                 | 82.09            | 83.19            | 81.53                               | 76.44             | 81.46              | 97.60                   | 97.01                    | 126.6 |
| C3                 | 161.70           | 164.44           | 154.13                              | 153.40            | 161.45             | 137.64                  | 152.45                   | 157.3 |
| C4                 | 197.15           | 199.57           | 192.14                              | 184.17            | 196.27             | 147.49                  | 168.53                   | 180.8 |
| C5                 | 178.34           | 181.02           | 173.52                              | 169.86            | 178.10             | 161.02                  | 173.91                   | 155.4 |
| C6                 | 155.04           | 157.70           | 149.55                              | 147.80            | 155.00             | 167.07                  | 169.12                   | 156.4 |
| C7                 | 307.48           | 311.38           | 310.59                              | 292.28            | 306.20             | 248.11                  | 274.67                   | 227.3 |
| COOCH <sub>3</sub> | 166.25           | 169.18           | 157.00                              | 157.01            | 166.26             | 155.57                  | 165.48                   | 163.1 |
| COOCH <sub>3</sub> | 55.59            | 56.44            | 52.44                               | 52.32             | 55.49              | 52.38                   | 55.45                    | 51.9  |

Table S5 <sup>1</sup>H NMR chemical shift values (in ppm) of **2** calculated at the DFT level using the ωB97X-D functional<sup>S1,S8</sup> and different Hamiltonians<sup>S9,S10,S4</sup> and basis sets<sup>S2,S11</sup>. The experimental values are taken from Ref. S5.

| <b>2</b> | ECP<br>def2-TZVP | ECP<br>def2-QZVP | X2C<br>dyall-vdz(Os)/<br>x2c-SVPall | X2C<br>x2c-SVPall | X2C<br>x2c-TZVPall | SO-X2C<br>x2c-SVPall-2c | SO-X2C<br>x2c-TZVPall-2c | Exp. |
|----------|------------------|------------------|-------------------------------------|-------------------|--------------------|-------------------------|--------------------------|------|
| H3       | 8.06             | 8.07             | 7.66                                | 7.50              | 8.01               | 7.74                    | 8.08                     | 7.70 |
| H5       | 9.62             | 9.64             | 9.29                                | 9.19              | 9.58               | 10.14                   | 10.46                    | 9.44 |

Table S6 <sup>13</sup>C NMR chemical shift values (in ppm) of **3** calculated at the DFT level using the ωB97X-D functional<sup>S1,S8</sup> and different Hamiltonians<sup>S9,S10</sup> and basis sets<sup>S2,S11</sup>. The experimental values are taken from Ref. S6.

| <b>3</b>           | ECP<br>def2-TZVP | ECP<br>def2-QZVP | X2C<br>dyall-vdz(Os)/<br>x2c-SVPall | X2C<br>x2c-SVPall | X2C<br>x2c-TZVPall | SO-X2C<br>x2c-SVPall-2c | SO-X2C<br>x2c-TZVPall-2c | Exp.  |
|--------------------|------------------|------------------|-------------------------------------|-------------------|--------------------|-------------------------|--------------------------|-------|
| C1                 | 267.18           | 271.54           | 268.36                              | 251.50            | 265.49             | 219.30                  | 243.55                   | 224.2 |
| C2                 | 100.36           | 102.02           | 95.89                               | 93.67             | 100.15             | 112.07                  | 114.88                   | 118.8 |
| C3                 | 148.16           | 150.47           | 143.67                              | 140.62            | 147.83             | 137.09                  | 146.43                   | 147.8 |
| C4                 | 206.75           | 209.24           | 198.86                              | 192.95            | 206.12             | 153.69                  | 177.45                   | 180.3 |
| C5                 | 187.86           | 190.68           | 182.12                              | 178.36            | 187.66             | 155.87                  | 172.63                   | 162.0 |
| C6                 | 157.62           | 159.88           | 152.60                              | 148.93            | 157.25             | 171.23                  | 172.94                   | 152.8 |
| C7                 | 388.84           | 394.25           | 392.73                              | 369.89            | 387.52             | 299.27                  | 358.90                   | 330.8 |
| COOCH <sub>3</sub> | 164.49           | 167.50           | 155.36                              | 155.24            | 164.48             | 150.69                  | 161.62                   | 159.9 |
| COOCH <sub>3</sub> | 55.67            | 56.51            | 52.51                               | 52.36             | 55.58              | 52.31                   | 55.45                    | 51.6  |

Table S7 <sup>1</sup>H NMR chemical shift values (in ppm) of **3** calculated at the DFT level using the ωB97X-D functional<sup>S1,S8</sup> and different Hamiltonians<sup>S9,S10,S4</sup> and basis sets<sup>S2,S11</sup>. The experimental values are taken from Ref. S6.

| <b>3</b> | ECP<br>def2-TZVP | ECP<br>def2-QZVP | X2C<br>dyall-vdz(Os)/<br>x2c-SVPall | X2C<br>x2c-SVPall | X2C<br>x2c-TZVPall | SO-X2C<br>x2c-SVPall-2c | SO-X2C<br>x2c-TZVPall-2c | Exp.  |
|----------|------------------|------------------|-------------------------------------|-------------------|--------------------|-------------------------|--------------------------|-------|
| H1       | 12.64            | 12.69            | 13.26                               | 12.32             | 12.55              | 15.19                   | 15.49                    | 13.30 |
| H3       | 8.57             | 8.59             | 8.17                                | 8.03              | 8.53               | 8.93                    | 9.43                     | 8.99  |
| H5       | 9.31             | 9.32             | 9.18                                | 8.88              | 9.28               | 9.63                    | 9.88                     | 8.09  |

Table S8 <sup>13</sup>C NMR chemical shift values (in ppm) of **4** calculated at the DFT level using the ωB97X-D functional<sup>S1,S8</sup> and different Hamiltonians<sup>S9,S10</sup> and basis sets<sup>S2,S11</sup>. The experimental values are taken from Ref. S7.

| <b>4</b> | ECP<br>def2-TZVP | ECP<br>def2-QZVP | X2C<br>dyall-vdz(Os)/<br>x2c-SVPall | X2C<br>x2c-SVPall | X2C<br>x2c-TZVPall | SO-X2C<br>x2c-SVPall-2c | SO-X2C<br>x2c-TZVPall-2c | Exp.                |
|----------|------------------|------------------|-------------------------------------|-------------------|--------------------|-------------------------|--------------------------|---------------------|
| C1       | 278.90           | 283.22           | 276.12                              | 261.47            | 277.49             | 238.83                  | 261.67                   | 232.16              |
| C2       | 90.37            | 92.05            | 88.54                               | 83.20             | 89.96              | 90.13                   | 96.27                    | 116.15              |
| C3       | 138.05           | 140.46           | 133.77                              | 131.25            | 137.79             | 144.84                  | 146.71                   | 141.19              |
| C4       | 212.40           | 214.97           | 203.53                              | 197.74            | 212.09             | 158.42                  | 184.97                   | 183.39              |
| C5       | 186.93           | 189.69           | 179.68                              | 177.04            | 186.62             | 178.86                  | 189.25                   | 163.72              |
| C6       | 125.15           | 127.43           | 119.39                              | 117.68            | 124.80             | 124.49                  | 129.17                   | 123.78              |
| C7       | 198.58           | 201.90           | 179.14                              | 185.24            | 198.96             | 166.71                  | 186.80                   | 181.74              |
| C8       | 43.32            | 44.06            | 43.19                               | 43.39             | 42.74              | 19.25                   | 24.70                    | 121.52 <sup>a</sup> |

<sup>a</sup> Probably incorrect assignment of the <sup>13</sup>C NMR signal of the C8 atom. The authors of Ref. S7 reported two <sup>13</sup>C NMR chemical shift for C8 of the related compound with para-methyl triphenyl phosphine attached to C8. One of them agrees well with our calculated value.

Table S9 <sup>1</sup>H NMR chemical shift values (in ppm) of **4** calculated at the DFT level using the ωB97X-D functional<sup>S1,S8</sup> and different Hamiltonians<sup>S9,S10,S4</sup> and basis sets<sup>S2,S11</sup>. The experimental values are taken from Ref. S7.

| <b>4</b> | ECP<br>def2-TZVP | ECP<br>def2-QZVP | X2C<br>dyall-vdz(Os)/<br>x2c-SVPall | X2C<br>x2c-SVPall | X2C<br>x2c-TZVPall | SO-X2C<br>x2c-SVPall-2c | SO-X2C<br>x2c-TZVPall-2c | Exp.  |
|----------|------------------|------------------|-------------------------------------|-------------------|--------------------|-------------------------|--------------------------|-------|
| H1       | 12.10            | 12.09            | 12.45                               | 11.89             | 12.07              | 13.26                   | 13.53                    | 12.12 |
| H3       | 7.26             | 7.26             | 6.82                                | 6.72              | 7.23               | 6.66                    | 7.23                     | 6.45  |
| H5       | 8.72             | 8.73             | 8.35                                | 8.23              | 8.68               | 8.53                    | 8.96                     | 6.35  |
| H6       | 6.50             | 6.51             | 6.14                                | 6.14              | 6.46               | 6.16                    | 6.45                     | 4.97  |

### S3 Difference between calculated and measured NMR chemical shifts

Table S10 Difference between calculated and measured  $^{13}\text{C}$  NMR chemical shifts for **1** calculated at different levels of theory with and without considering solvent effects using COSMO.<sup>S 12,S 13</sup>

| Molecule 1         | ECP<br>def2-TZVP | ECP<br>def2-TZVP<br>COSMO | X2C<br>X2C-TZVPall | X2C<br>X2C-TZVPall<br>COSMO | SO-X2C<br>X2C-TZVPall-2c | SO-X2C<br>X2C-TZVPall-2c<br>COSMO |
|--------------------|------------------|---------------------------|--------------------|-----------------------------|--------------------------|-----------------------------------|
| C1                 | 43.3             | 45.0                      | 42.6               | 44.3                        | 2.1                      | 4.3                               |
| C2                 | -29.2            | -19.3                     | -29.4              | -19.6                       | -16.8                    | -7.6                              |
| C3                 | 3.6              | 11.5                      | 3.2                | 11.2                        | 2.0                      | 9.8                               |
| C4                 | 26.2             | 22.8                      | 25.8               | 22.3                        | -3.8                     | -7.1                              |
| C5                 | 25.6             | 24.7                      | 25.0               | 24.0                        | 19.4                     | 19.1                              |
| C6                 | 2.8              | 0.8                       | 2.7                | 0.6                         | 18.2                     | 15.5                              |
| C7                 | 72.9             | 69.3                      | 72.4               | 68.8                        | 23.6                     | 19.4                              |
| COOCH <sub>3</sub> | 4.5              | 8.7                       | 4.5                | 8.7                         | 2.8                      | 7.2                               |
| COOCH <sub>3</sub> | 7.2              | 5.6                       | 7.1                | 5.5                         | 7.1                      | 5.5                               |

Table S11 Difference between calculated and measured  $^1\text{H}$  NMR chemical shifts for **1** calculated at different levels of theory with and without considering solvent effects using COSMO.<sup>S 12,S 13</sup>

| Molecule 1 | ECP<br>def2-TZVP | ECP<br>def2-TZVP<br>COSMO | X2C<br>X2C-TZVPall | X2C<br>X2C-TZVPall<br>COSMO | SO-X2C<br>X2C-TZVPall-2c | SO-X2C<br>X2C-TZVPall-2c<br>COSMO |
|------------|------------------|---------------------------|--------------------|-----------------------------|--------------------------|-----------------------------------|
| H1         | 0.47             | 0.34                      | 0.43               | 0.32                        | 1.58                     | 1.41                              |
| H3         | -0.38            | -0.16                     | -0.45              | -0.23                       | 0.02                     | 0.25                              |
| H5         | 1.07             | 0.94                      | 1.03               | 0.89                        | 1.83                     | 1.64                              |

Table S12 Difference between calculated and measured  $^{13}\text{C}$  NMR chemical shifts for **2** calculated at different levels of theory with and without considering solvent effects using COSMO.<sup>S 12,S 13</sup>

| Molecule 2         | ECP<br>def2-TZVP | ECP<br>def2-TZVP<br>COSMO | X2C<br>X2C-TZVPall | X2C<br>X2C-TZVPall<br>COSMO | SO-X2C<br>X2C-TZVPall-2c | SO-X2C<br>X2C-TZVPall-2c<br>COSMO |
|--------------------|------------------|---------------------------|--------------------|-----------------------------|--------------------------|-----------------------------------|
| C1                 | 56.0             | 55.1                      | 55.0               | 53.9                        | 21.5                     | 21.0                              |
| C2                 | -44.5            | -30.4                     | -45.1              | -31.1                       | -29.6                    | -15.8                             |
| C3                 | 4.4              | 16.5                      | 4.2                | 16.3                        | -4.8                     | 5.9                               |
| C4                 | 16.3             | 15.0                      | 15.5               | 14.2                        | -12.3                    | -11.9                             |
| C5                 | 22.9             | 21.5                      | 22.7               | 21.2                        | 18.5                     | 16.4                              |
| C6                 | -1.4             | -2.9                      | -1.4               | -3.0                        | 12.7                     | 11.6                              |
| C7                 | 80.2             | 68.3                      | 78.9               | 67.1                        | 47.4                     | 33.5                              |
| COOCH <sub>3</sub> | 3.2              | 7.2                       | 3.2                | 7.3                         | 2.4                      | 6.6                               |
| COOCH <sub>3</sub> | 3.7              | 3.7                       | 3.6                | 3.6                         | 3.5                      | 3.6                               |

Table S13 Difference between calculated and measured  $^1\text{H}$  NMR chemical shifts for **2** calculated at different levels of theory with and without considering solvent effects using COSMO.<sup>S 12,S 13</sup>

| Molecule 2 | ECP<br>def2-TZVP | ECP<br>def2-TZVP<br>COSMO | X2C<br>X2C-TZVPall | X2C<br>X2C-TZVPall<br>COSMO | SO-X2C<br>X2C-TZVPall-2c | SO-X2C<br>X2C-TZVPall-2c<br>COSMO |
|------------|------------------|---------------------------|--------------------|-----------------------------|--------------------------|-----------------------------------|
| H3         | 0.36             | 0.88                      | 0.31               | 0.83                        | 0.38                     | 1.05                              |
| H5         | 0.18             | 0.11                      | 0.14               | 0.07                        | 1.02                     | 1.03                              |

Table S14 Difference between calculated and measured  $^{13}\text{C}$  NMR chemical shifts for **3** calculated at different levels of theory with and without considering solvent effects using COSMO.<sup>5,12,13</sup>

| Molecule <b>3</b>  | ECP<br>def2-TZVP | ECP<br>def2-TZVP<br>COSMO | X2C<br>X2C-TZVPall | X2C<br>X2C-TZVPall<br>COSMO | SO-X2C<br>X2C-TZVPall-2c | SO-X2C<br>X2C-TZVPall-2c<br>COSMO |
|--------------------|------------------|---------------------------|--------------------|-----------------------------|--------------------------|-----------------------------------|
| C1                 | 43.0             | 40.1                      | 41.3               | 38.6                        | 19.3                     | 15.3                              |
| C2                 | -18.4            | -5.7                      | -18.6              | -6.0                        | -3.9                     | 8.0                               |
| C3                 | 0.4              | 9.1                       | 0.0                | 8.8                         | -1.4                     | 6.8                               |
| C4                 | 26.5             | 20.7                      | 26.0               | 20.0                        | -2.8                     | -8.7                              |
| C5                 | 25.9             | 27.1                      | 25.7               | 26.8                        | 10.6                     | 13.2                              |
| C6                 | 4.8              | 0.9                       | 4.4                | 0.4                         | 20.1                     | 16.0                              |
| C7                 | 58.0             | 52.0                      | 56.7               | 50.6                        | 28.1                     | 26.8                              |
| COOCH <sub>3</sub> | 4.6              | 9.2                       | 4.6                | 9.2                         | 1.7                      | 6.6                               |
| COOCH <sub>3</sub> | 4.1              | 4.1                       | 4.0                | 4.0                         | 3.9                      | 3.9                               |

Table S15 Difference between calculated and measured  $^1\text{H}$  NMR chemical shifts for **3** calculated at different levels of theory with and without considering solvent effects using COSMO.<sup>5,12,13</sup>

| Molecule <b>3</b> | ECP<br>def2-TZVP | ECP<br>def2-TZVP<br>COSMO | X2C<br>X2C-TZVPall | X2C<br>X2C-TZVPall<br>COSMO | SO-X2C<br>X2C-TZVPall-2c | SO-X2C<br>X2C-TZVPall-2c<br>COSMO |
|-------------------|------------------|---------------------------|--------------------|-----------------------------|--------------------------|-----------------------------------|
| H1                | -0.66            | -0.63                     | -0.75              | -0.72                       | 2.19                     | 2.19                              |
| H3                | -0.42            | -0.17                     | -0.46              | -0.21                       | 0.44                     | 0.72                              |
| H5                | 1.22             | 1.30                      | 1.19               | 1.26                        | 1.79                     | 1.88                              |

Table S16 Difference between calculated and measured  $^{13}\text{C}$  NMR chemical shifts for **4** calculated at different levels of theory with and without considering solvent effects using COSMO.<sup>5,12,13</sup>

| Molecule <b>4</b> | ECP<br>def2-TZVP | ECP<br>def2-TZVP<br>COSMO | X2C<br>X2C-TZVPall | X2C<br>X2C-TZVPall<br>COSMO | SO-X2C<br>X2C-TZVPall-2c | SO-X2C<br>X2C-TZVPall-2c<br>COSMO |
|-------------------|------------------|---------------------------|--------------------|-----------------------------|--------------------------|-----------------------------------|
| C1                | 46.74            | 40.94                     | 45.33              | 39.68                       | 29.51                    | 24.35                             |
| C2                | -25.78           | -16.35                    | -26.19             | -16.85                      | -19.88                   | -11.17                            |
| C3                | -3.14            | 1.09                      | -3.40              | 0.76                        | 5.52                     | 9.65                              |
| C4                | 29.01            | 26.47                     | 28.70              | 26.26                       | 1.58                     | -2.00                             |
| C5                | 23.21            | 23.30                     | 22.90              | 22.92                       | 25.53                    | 25.44                             |
| C6                | 1.37             | -0.45                     | 1.02               | -0.76                       | 5.39                     | 3.42                              |
| C7                | 16.84            | 11.76                     | 17.22              | 12.17                       | 5.06                     | -0.10                             |

Table S17 Difference between calculated and measured  $^1\text{H}$  NMR chemical shifts for **4** calculated at different levels of theory with and without considering solvent effects using COSMO.<sup>5,12,13</sup>

| Molecule <b>4</b> | ECP<br>def2-TZVP | ECP<br>def2-TZVP<br>COSMO | X2C<br>X2C-TZVPall | X2C<br>X2C-TZVPall<br>COSMO | SO-X2C<br>X2C-TZVPall-2c | SO-X2C<br>X2C-TZVPall-2c<br>COSMO |
|-------------------|------------------|---------------------------|--------------------|-----------------------------|--------------------------|-----------------------------------|
| H1                | -0.02            | -0.40                     | -0.05              | -0.41                       | 1.41                     | 0.99                              |
| H3                | 0.81             | 0.88                      | 0.78               | 0.84                        | 0.78                     | 0.78                              |
| H5                | 2.37             | 2.29                      | 2.33               | 2.24                        | 2.61                     | 2.51                              |
| H6                | 1.53             | 1.37                      | 1.49               | 1.33                        | 1.48                     | 1.32                              |

## S4 Magnetic shielding constants of reference compounds.

Table S18 Isotropic shielding constants (in ppm) for TMS calculated at the DFT level using the  $\omega$ B97X-D functional<sup>S1,S8</sup> and different Hamiltonians<sup>S9,S10,S4</sup> and basis sets<sup>S2,S11</sup>.

| Nucleus | ECP<br>def2-TZVP | ECP<br>def2-QZVP | X2C<br>dyall-vdz(Os)/<br>x2c-SVPall | X2C<br>x2c-SVPall | X2C<br>x2c-TZVPall | SO-X2C<br>x2c-SVPall-2c | SO-X2C<br>x2c-TZVPall-2c |
|---------|------------------|------------------|-------------------------------------|-------------------|--------------------|-------------------------|--------------------------|
| C       | 188.7541         | 187.5214         | 196.3534                            | 196.0561          | 188.6838           | 195.7325                | 189.7060                 |
| H       | 31.9268          | 31.6440          | 31.7884                             | 31.7703           | 31.9252            | 31.7758                 | 31.9274                  |

Table S19 Isotropic shielding constants, chemical shift values and deviations from experimental values (in ppm) for benzene calculated at the DFT level using the  $\omega$ B97X-D functional<sup>S1,S8</sup> and different Hamiltonians<sup>S9,S10,S4</sup> and basis sets<sup>S2,S11</sup>. The experimental chemical shift values are 128.3600 ppm for carbon and 7.3390 ppm for hydrogen.<sup>S14</sup>

| Shielding | ECP<br>def2-TZVP | ECP<br>def2-QZVP | X2C<br>dyall-vdz(Os)/<br>x2c-SVPall | X2C<br>x2c-SVPall | X2C<br>x2c-TZVPall | SO-X2C<br>x2c-SVPall-2c | SO-X2C<br>x2c-TZVPall-2c |
|-----------|------------------|------------------|-------------------------------------|-------------------|--------------------|-------------------------|--------------------------|
| C         | 53.7633          | 50.2096          | 69.2383                             | 69.0361           | 53.6598            | 68.5996                 | 54.6769                  |
| H         | 24.2268          | 23.9424          | 24.4577                             | 24.4440           | 24.2199            | 24.4223                 | 24.1947                  |
| Shift     |                  |                  |                                     |                   |                    |                         |                          |
| C         | 134.9908         | 137.3118         | 127.1151                            | 127.0200          | 135.0240           | 127.1330                | 135.0290                 |
| H         | 7.7000           | 7.7016           | 7.3307                              | 7.3263            | 7.7053             | 7.3536                  | 7.7328                   |
| Deviation |                  |                  |                                     |                   |                    |                         |                          |
| C         | 6.6308           | 8.9518           | -1.2449                             | -1.3400           | 6.6640             | -1.2270                 | 6.6690                   |
| H         | 0.3610           | 0.3626           | -0.0083                             | -0.0127           | 0.3663             | 0.0146                  | 0.3938                   |

## S5 Population analysis

Table S20 Natural Population Analysis (NPA) for **1**.<sup>S15</sup> The phosphine hydrogen atoms are omitted and complete shell numbers removed. The total charge of **1** is +2.

| Molecule 1         | charge | n(s) | n(p) | n(d) | n(f) | sum valence |
|--------------------|--------|------|------|------|------|-------------|
| Os                 | 0.26   | 0.49 | 0.00 | 7.25 | 0.01 | 8           |
| C1                 | -0.14  | 1.08 | 3.05 | 0.01 | 0.00 | 4           |
| C2                 | -0.53  | 1.00 | 3.52 | 0.01 | 0.00 | 4           |
| C3                 | -0.12  | 0.98 | 3.13 | 0.01 | 0.00 | 4           |
| C4                 | -0.17  | 1.01 | 3.16 | 0.01 | 0.00 | 4           |
| C5                 | -0.01  | 1.00 | 3.00 | 0.01 | 0.00 | 4           |
| C6                 | -0.27  | 0.97 | 3.29 | 0.01 | 0.00 | 4           |
| C7                 | 0.01   | 1.08 | 2.89 | 0.01 | 0.00 | 4           |
| H1                 | 0.24   | 0.76 | 0.00 | 0.00 | 0.00 | 1           |
| H3                 | 0.25   | 0.75 | 0.00 | 0.00 | 0.00 | 1           |
| H5                 | 0.26   | 0.74 | 0.00 | 0.00 | 0.00 | 1           |
| Cl                 | 0.27   | 1.80 | 4.90 | 0.02 | 0.00 | 7           |
| COOCH <sub>3</sub> | 0.76   | 0.77 | 2.46 | 0.01 | 0.00 | 4           |
| COOCH <sub>3</sub> | -0.54  | 1.70 | 4.82 | 0.02 | 0.00 | 6           |
| COOCH <sub>3</sub> | -0.46  | 1.60 | 4.84 | 0.01 | 0.00 | 6           |
| COOCH <sub>3</sub> | -0.27  | 1.12 | 3.14 | 0.01 | 0.00 | 4           |
| P                  | 0.85   | 1.24 | 2.87 | 0.04 | 0.00 | 5           |
| [Os] Cl            | -0.36  | 1.91 | 5.44 | 0.01 | 0.00 | 7           |
| [Os] P             | 0.34   | 1.38 | 3.24 | 0.04 | 0.00 | 5           |
| [Os] P             | 0.34   | 1.38 | 3.24 | 0.04 | 0.00 | 5           |

Table S21 Natural Population Analysis (NPA) for 2.<sup>S 15</sup> The phosphine hydrogen atoms are omitted and complete shell numbers removed. The total charge of 2 is +1.

| Molecule 2         | charge | n(s) | n(p) | n(d) | n(f) | sum valence |
|--------------------|--------|------|------|------|------|-------------|
| Os                 | 0.22   | 0.47 | 0.00 | 7.31 | 0.01 | 8           |
| C1                 | 0.03   | 1.30 | 2.66 | 0.01 | 0.00 | 4           |
| C2                 | -0.71  | 1.02 | 3.67 | 0.01 | 0.00 | 4           |
| C3                 | -0.11  | 0.99 | 3.12 | 0.01 | 0.00 | 4           |
| C4                 | -0.22  | 1.01 | 3.21 | 0.01 | 0.00 | 4           |
| C5                 | -0.04  | 0.99 | 3.05 | 0.01 | 0.00 | 4           |
| C6                 | -0.30  | 0.96 | 3.33 | 0.01 | 0.00 | 4           |
| C7                 | -0.07  | 1.16 | 2.91 | 0.01 | 0.00 | 4           |
| H3                 | 0.22   | 0.78 | 0.00 | 0.00 | 0.00 | 1           |
| H5                 | 0.24   | 0.76 | 0.00 | 0.00 | 0.00 | 1           |
| Cl                 | 0.13   | 1.80 | 5.05 | 0.02 | 0.00 | 7           |
| COOCH <sub>3</sub> | 0.75   | 0.79 | 2.45 | 0.01 | 0.00 | 4           |
| COOCH <sub>3</sub> | -0.55  | 1.70 | 4.83 | 0.02 | 0.00 | 6           |
| COOCH <sub>3</sub> | -0.48  | 1.61 | 4.85 | 0.01 | 0.00 | 6           |
| COOCH <sub>3</sub> | -0.26  | 1.11 | 3.15 | 0.01 | 0.00 | 4           |
| P                  | 0.89   | 1.21 | 2.85 | 0.05 | 0.00 | 5           |
| [Os] Cl            | -0.48  | 1.92 | 5.55 | 0.01 | 0.00 | 7           |
| [Os] P             | 0.38   | 1.37 | 3.21 | 0.04 | 0.00 | 5           |
| [Os] P             | 0.38   | 1.37 | 3.20 | 0.04 | 0.00 | 5           |

Table S22 Natural Population Analysis (NPA) for 3.<sup>S 15</sup> The phosphine hydrogen atoms are omitted and complete shell numbers removed. The total charge of 3 is +1.

| Molecule 3         | charge | n(s) | n(p) | n(d) | n(f) | sum valence |
|--------------------|--------|------|------|------|------|-------------|
| Os                 | 0.20   | 0.47 | 0.00 | 7.32 | 0.01 | 8           |
| C1                 | -0.28  | 1.14 | 3.13 | 0.01 | 0.00 | 4           |
| C2                 | -0.55  | 1.00 | 3.53 | 0.01 | 0.00 | 4           |
| C3                 | -0.21  | 0.97 | 3.23 | 0.01 | 0.00 | 4           |
| C4                 | -0.17  | 1.01 | 3.15 | 0.01 | 0.00 | 4           |
| C5                 | -0.07  | 1.00 | 3.06 | 0.01 | 0.00 | 4           |
| C6                 | -0.33  | 0.98 | 3.34 | 0.01 | 0.00 | 4           |
| C7                 | 0.14   | 1.30 | 2.54 | 0.01 | 0.00 | 4           |
| H1                 | 0.21   | 0.79 | 0.00 | 0.00 | 0.00 | 1           |
| H3                 | 0.22   | 0.78 | 0.00 | 0.00 | 0.00 | 1           |
| H5                 | 0.24   | 0.76 | 0.00 | 0.00 | 0.00 | 1           |
| COOCH <sub>3</sub> | 0.75   | 0.78 | 2.45 | 0.01 | 0.00 | 4           |
| COOCH <sub>3</sub> | -0.55  | 1.70 | 4.83 | 0.02 | 0.00 | 6           |
| COOCH <sub>3</sub> | -0.47  | 1.61 | 4.85 | 0.01 | 0.00 | 6           |
| COOCH <sub>3</sub> | -0.26  | 1.11 | 3.15 | 0.01 | 0.00 | 4           |
| P                  | 0.86   | 1.22 | 2.87 | 0.04 | 0.00 | 5           |
| [Os] Cl            | -0.49  | 1.92 | 5.57 | 0.01 | 0.00 | 7           |
| [Os] P             | 0.39   | 1.37 | 3.20 | 0.04 | 0.00 | 5           |
| [Os] P             | 0.39   | 1.37 | 3.20 | 0.04 | 0.00 | 5           |



Table S23 Natural Population Analysis (NPA) for 4.<sup>S15</sup> The phosphine hydrogen atoms are omitted and complete shell numbers removed. The total charge of 4 is +1.

| Molecule 4 | charge | n(s) | n(p) | n(d) | n(f) | sum valence |
|------------|--------|------|------|------|------|-------------|
| Os         | 0.04   | 0.44 | 0.01 | 7.51 | 0.00 | 8           |
| C1         | -0.20  | 1.11 | 3.08 | 0.01 | 0.00 | 4           |
| C2         | -0.60  | 1.00 | 3.58 | 0.01 | 0.00 | 4           |
| C3         | -0.25  | 0.97 | 3.28 | 0.00 | 0.00 | 4           |
| C4         | -0.16  | 1.01 | 3.15 | 0.01 | 0.00 | 4           |
| C5         | -0.12  | 0.99 | 3.12 | 0.01 | 0.00 | 4           |
| C6         | -0.31  | 0.98 | 3.32 | 0.01 | 0.00 | 4           |
| C7         | 0.11   | 0.92 | 2.96 | 0.01 | 0.00 | 4           |
| C8         | -0.75  | 0.98 | 3.75 | 0.01 | 0.01 | 4           |
| H1         | 0.20   | 0.79 | 0.00 | 0.00 | 0.00 | 1           |
| H3         | 0.21   | 0.79 | 0.00 | 0.00 | 0.00 | 1           |
| H5         | 0.22   | 0.78 | 0.00 | 0.00 | 0.00 | 1           |
| H6         | 0.24   | 0.76 | 0.00 | 0.00 | 0.00 | 1           |
| P (C2)     | 0.88   | 1.21 | 2.86 | 0.05 | 0.00 | 5           |
| P (C8)     | 0.93   | 1.18 | 2.83 | 0.06 | 0.00 | 5           |
| [Os] Cl    | -0.58  | 1.92 | 5.65 | 0.01 | 0.00 | 7           |
| [Os] P     | 0.39   | 1.37 | 3.20 | 0.04 | 0.00 | 5           |
| [Os] P     | 0.39   | 1.37 | 3.19 | 0.04 | 0.00 | 5           |

Table S24 Natural Population Analysis (NPA)<sup>S15</sup> results for the osmium atom in molecules 1-4.

| Molecule | charge | n(s) | n(p) | n(d) | n(f) | sum valence |
|----------|--------|------|------|------|------|-------------|
| 1 - Os   | 0.26   | 0.49 | 0.00 | 7.25 | 0.01 | 8           |
| 2 - Os   | 0.22   | 0.47 | 0.00 | 7.31 | 0.01 | 8           |
| 3 - Os   | 0.20   | 0.47 | 0.00 | 7.32 | 0.01 | 8           |
| 4 - Os   | 0.04   | 0.44 | 0.01 | 7.51 | 0.00 | 8           |

## S6 Paratropic current density

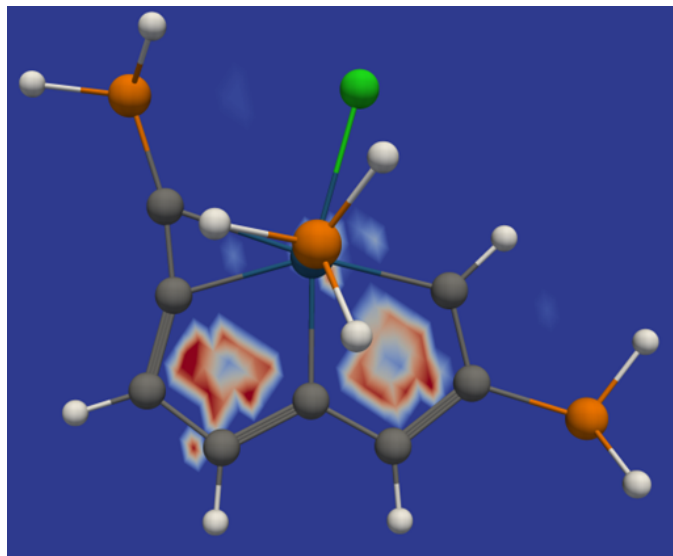

Fig. S3 The paratropic current-density pathways of **4**.

## S7 Ring-current profiles

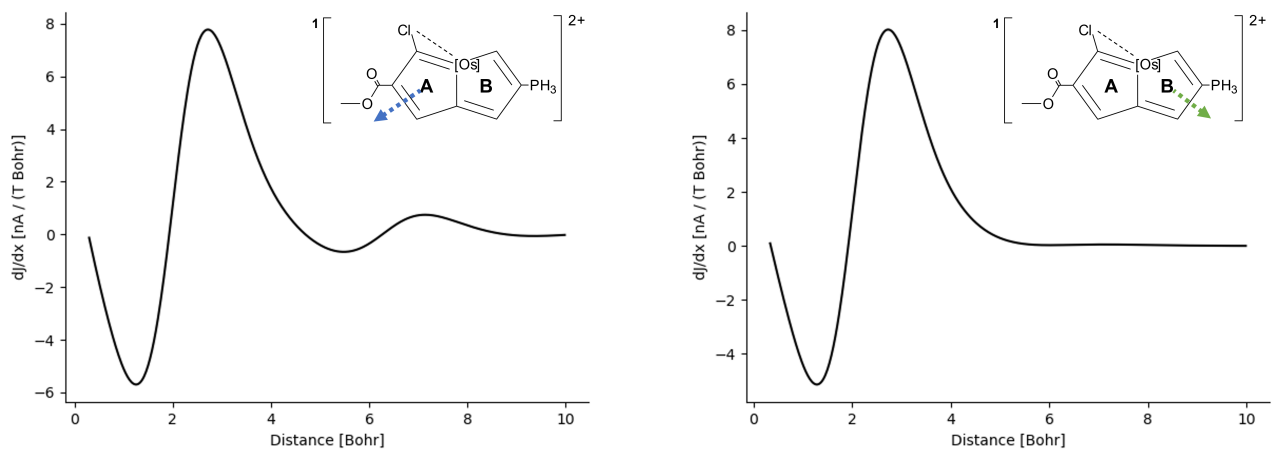

Fig. S4 The ring-current profile of **1** along the integration planes in ring A (left) and in ring B (right).

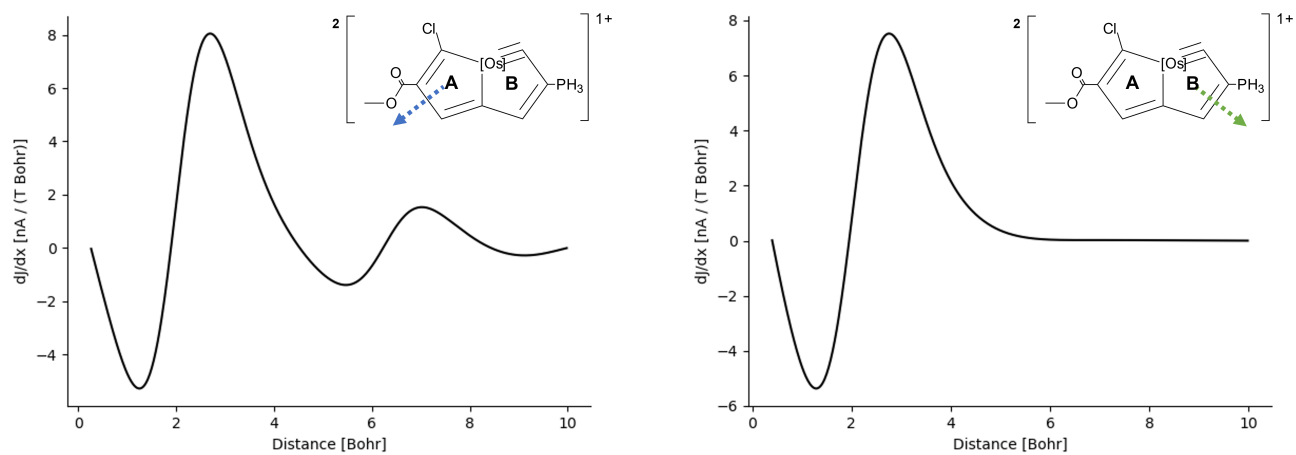

Fig. S5 The ring-current profile of **2** along the integration planes in ring A (left) and in ring B (right).

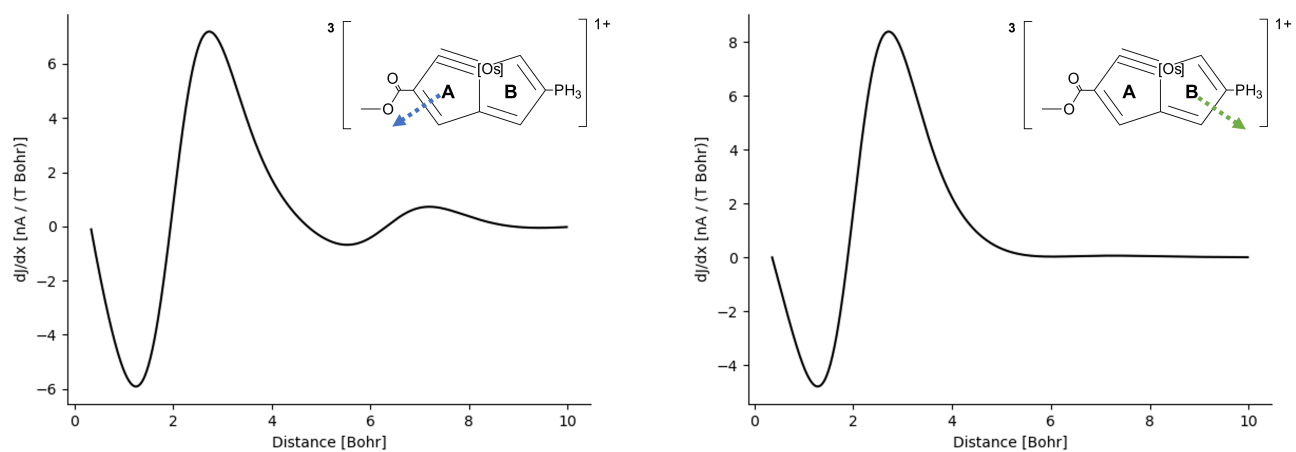

Fig. S6 The ring-current profile of **3** along the integration planes in ring A (left) and in ring B (right).

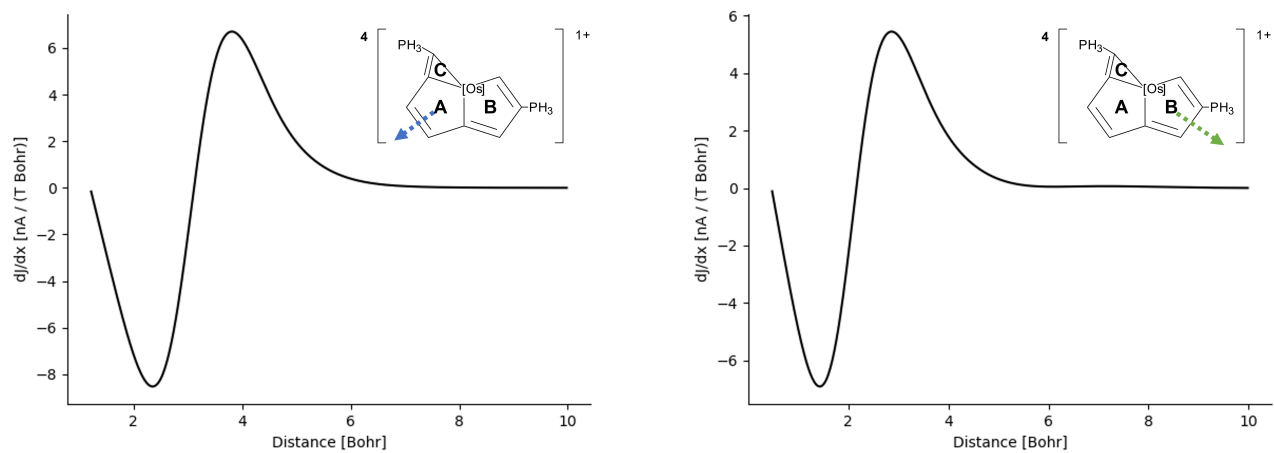

Fig. S7 The ring-current profile of **4** along the integration planes in ring A (left) and in ring B (right).

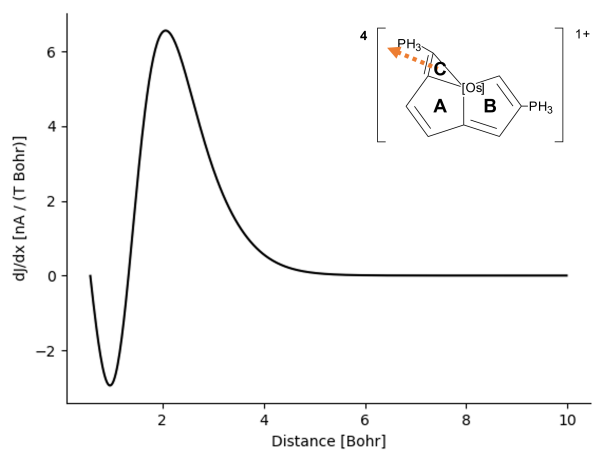

Fig. S8 The ring-current profile of **4** along the integration plane in ring C.

## S8 Cartesian coordinates

All structures are optimised at DFT-level using the  $\omega$ B97X-D functional<sup>S1</sup> and the def2-TZVP basis sets<sup>S2</sup>. Relativistic effects were considered by using an ECP<sup>S3,S4</sup> on Os.

### Molecule 1

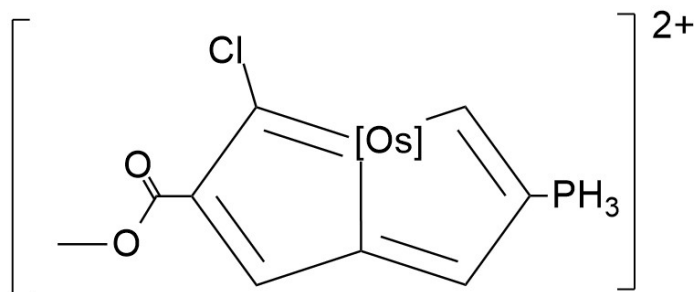

Molecule 1, [Os] denotes Os(PH<sub>3</sub>)<sub>2</sub>Cl, Energy: -2537.1328 Hartree

32

|    |           |           |           |
|----|-----------|-----------|-----------|
| C  | -0.941935 | 1.078695  | 0.000709  |
| C  | -1.589965 | -0.143909 | 0.000436  |
| C  | -0.596194 | -1.104499 | 0.001123  |
| C  | 0.708048  | -0.551811 | 0.000993  |
| Os | 0.943431  | 1.567232  | -0.000007 |
| C  | 2.781343  | 0.780132  | -0.001374 |
| C  | 3.020923  | -0.566255 | -0.000719 |
| C  | 1.826530  | -1.337783 | 0.000670  |
| C  | -3.082437 | -0.305257 | -0.000703 |
| Cl | -1.582340 | 2.648784  | 0.001231  |
| Cl | 1.967502  | 3.692943  | -0.001734 |
| P  | 0.968937  | 1.827409  | 2.403190  |
| O  | -3.814037 | 0.643293  | 0.000856  |
| O  | -3.428193 | -1.572753 | -0.003761 |
| C  | -4.851534 | -1.837118 | -0.005347 |
| H  | -0.798739 | -2.170362 | 0.001592  |
| H  | 3.586635  | 1.510096  | -0.002616 |
| H  | 1.790732  | -2.422282 | 0.001324  |
| H  | 5.583986  | -0.153279 | 0.002699  |
| H  | 4.961303  | -1.999878 | -1.122318 |
| H  | 0.789345  | 0.719980  | 3.245850  |
| H  | -0.021081 | 2.704368  | 2.872146  |
| H  | -4.944714 | -2.916903 | -0.009105 |
| H  | -5.302396 | -1.402057 | -0.893919 |
| H  | -5.303143 | -1.408141 | 0.885811  |
| H  | 2.132084  | 2.413810  | 2.917293  |
| H  | 4.958962  | -2.008179 | 1.113082  |
| P  | 4.672208  | -1.211954 | -0.001956 |
| P  | 0.965066  | 1.827343  | -2.403295 |
| H  | -0.022821 | 2.708134  | -2.869547 |
| H  | 0.779305  | 0.720815  | -3.245800 |
| H  | 2.129127  | 2.409507  | -2.920093 |

Molecule 2

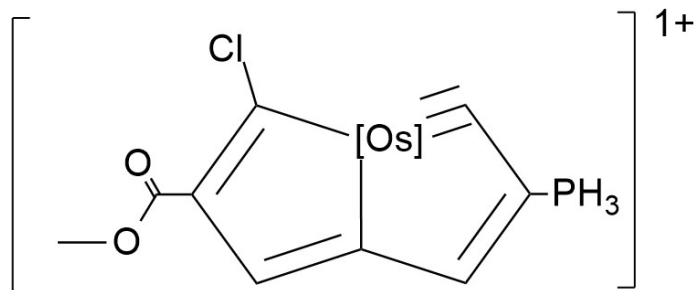

Molecule 2, [Os] denotes Os(PH<sub>3</sub>)<sub>2</sub>Cl, Energy: -2536.8465 Hartree

31

|    |           |           |           |
|----|-----------|-----------|-----------|
| C  | -1.576969 | -0.908943 | -0.109669 |
| C  | -1.323369 | 0.464605  | 0.002174  |
| C  | 0.035266  | 0.730171  | 0.092236  |
| C  | 0.867972  | -0.391608 | 0.025954  |
| Os | -0.024836 | -2.276963 | -0.173347 |
| C  | 1.777208  | -2.545339 | -0.137835 |
| C  | 2.811642  | -1.621897 | -0.016627 |
| C  | 2.247463  | -0.320416 | 0.079120  |
| C  | -2.356245 | 1.548901  | -0.011501 |
| Cl | -1.318787 | -4.318382 | -0.404366 |
| P  | -0.212570 | -2.328536 | -2.544878 |
| O  | -3.422288 | 1.467871  | -0.550715 |
| O  | -1.919284 | 2.631362  | 0.633438  |
| C  | -2.827483 | 3.740376  | 0.651703  |
| H  | 0.410360  | 1.742475  | 0.199765  |
| H  | 2.815945  | 0.600169  | 0.178396  |
| H  | 4.499132  | -3.534033 | -0.118208 |
| H  | 5.195305  | -1.832223 | 1.153068  |
| H  | 0.382329  | -1.351211 | -3.361489 |
| H  | -1.530918 | -2.298994 | -3.019375 |
| H  | -2.324467 | 4.523965  | 1.208799  |
| H  | -3.756307 | 3.455353  | 1.141752  |
| H  | -3.044769 | 4.065832  | -0.363704 |
| H  | 0.260816  | -3.502388 | -3.144697 |
| H  | 5.270745  | -1.651303 | -1.041904 |
| P  | 4.467540  | -2.143083 | -0.003760 |
| P  | -0.366237 | -2.752779 | 2.131188  |
| H  | 0.175153  | -1.948752 | 3.149281  |
| H  | -1.713407 | -2.790898 | 2.516333  |
| H  | 0.062243  | -4.022814 | 2.537597  |
| Cl | -3.189775 | -1.457995 | -0.160675 |

### Molecule 3

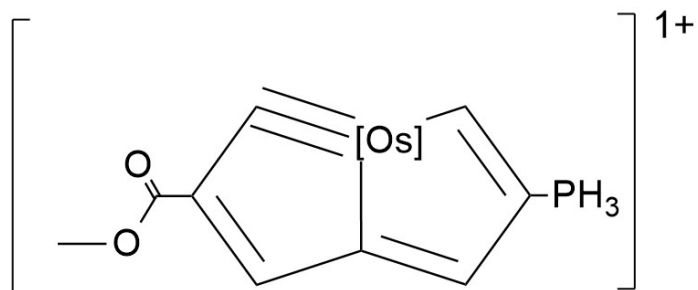

Molecule 3, [Os] denotes Os(PH<sub>3</sub>)<sub>2</sub>Cl, Energy: -2077.2392 Hartree

31

|    |           |           |           |
|----|-----------|-----------|-----------|
| C  | -1.220914 | -2.850751 | 0.001770  |
| H  | -1.691775 | -3.834237 | 0.002610  |
| C  | -1.994093 | -1.715609 | 0.001047  |
| C  | -1.274904 | -0.475433 | 0.000268  |
| H  | -1.752039 | 0.499921  | -0.000268 |
| C  | 0.076013  | -0.657724 | 0.000452  |
| C  | 1.041876  | 0.404545  | 0.000079  |
| H  | 0.793466  | 1.461717  | 0.000089  |
| C  | 2.326540  | -0.076894 | -0.000105 |
| C  | 2.233476  | -1.486206 | -0.000089 |
| C  | 3.620793  | 0.654749  | 0.000086  |
| C  | 4.660675  | 2.743287  | 0.001337  |
| H  | 4.348130  | 3.782133  | 0.000973  |
| H  | 5.249913  | 2.516447  | -0.884932 |
| H  | 5.247845  | 2.516433  | 0.888974  |
| H  | 0.014483  | -3.838689 | 2.902292  |
| H  | 2.150230  | -3.554189 | 2.761284  |
| H  | 0.862232  | -1.885964 | 3.259230  |
| H  | 0.826225  | -1.898079 | -3.261240 |
| H  | 2.154119  | -3.534775 | -2.765467 |
| H  | 0.024250  | -3.867511 | -2.887644 |
| H  | -4.129835 | -3.179424 | 0.001341  |
| H  | -4.390728 | -1.257933 | -1.100137 |
| H  | -4.390934 | -1.257532 | 1.101920  |
| Cl | 1.155806  | -5.023769 | 0.002626  |
| P  | 0.952832  | -2.955072 | 2.351575  |
| P  | 0.946932  | -2.960469 | -2.349062 |
| P  | -3.745865 | -1.837314 | 0.001093  |
| O  | 4.680768  | 0.093980  | 0.000435  |
| O  | 3.451306  | 1.972556  | 0.000074  |
| Os | 0.827176  | -2.610283 | 0.001077  |

Molecule 4

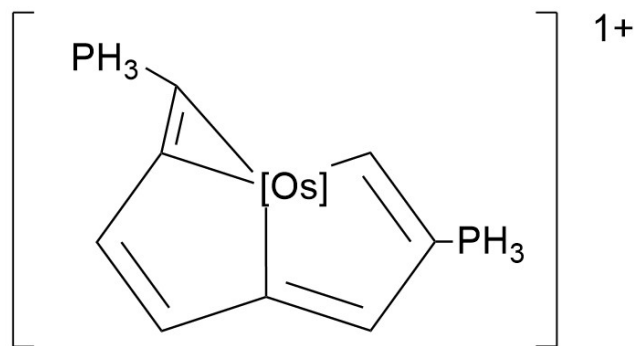

Molecule 4, [Os] denotes Os(PH<sub>3</sub>)<sub>2</sub>Cl, Energy: -2230.6164 Hartree

30

|    |           |           |           |
|----|-----------|-----------|-----------|
| Os | -1.677714 | -1.929191 | -0.000090 |
| Cl | -2.439245 | -4.312428 | -0.000169 |
| P  | -1.698156 | -1.999065 | 2.351669  |
| P  | -5.136707 | -2.405696 | -0.001931 |
| P  | -1.697118 | -1.999320 | -2.351748 |
| P  | 2.918871  | -2.168435 | -0.000595 |
| C  | -3.030553 | -0.363056 | -0.000781 |
| C  | -1.246335 | 1.086151  | -0.000073 |
| H  | -0.723744 | 2.038318  | 0.000082  |
| C  | 0.241397  | -2.612987 | 0.000143  |
| H  | 0.484499  | -3.676167 | 0.000020  |
| C  | -0.543467 | -0.184733 | -0.000071 |
| C  | -2.593117 | 0.996149  | -0.000401 |
| H  | -3.278275 | 1.833172  | -0.000545 |
| C  | 0.805323  | -0.295661 | -0.000093 |
| H  | 1.485579  | 0.551699  | -0.000028 |
| C  | -3.836899 | -1.361410 | -0.001200 |
| C  | 1.251645  | -1.678655 | -0.000157 |
| H  | -1.606660 | -3.262014 | -2.961442 |
| H  | -2.830120 | -1.499825 | -3.025880 |
| H  | -0.701459 | -1.317945 | -3.076154 |
| H  | 3.691900  | -1.746655 | -1.094089 |
| H  | 3.014218  | -3.560784 | 0.002813  |
| H  | 3.693456  | -1.740760 | 1.089470  |
| H  | -0.702263 | -1.318506 | 3.076550  |
| H  | -2.830900 | -1.498849 | 3.025690  |
| H  | -1.608693 | -3.261950 | 2.961057  |
| H  | -6.389603 | -1.774955 | -0.009080 |
| H  | -5.165631 | -3.276102 | -1.097833 |
| H  | -5.174994 | -3.267248 | 1.100755  |



## References

- S1. J.-D. Chai and M. Head-Gordon, *Phys. Chem. Chem. Phys.*, 2008, **10**, 6615–6620.
- S2. F. Weigend and R. Ahlrichs, *Phys. Chem. Chem. Phys.*, 2005, **7**, 3297–3305.
- S3. D. Andrae, U. Häussermann, M. Dolg, H. Stoll and H. Preuss, *Theor. Chim. Acta*, 1990, **77**, 123–141.
- S4. M. Dolg and X. Cao, *Chem. Rev.*, 2012, **112**, 403–80.
- S5. Y. Cai, Y. Hua, Z. Lu, Q. Lan, Z. Lin, J. Fei, Z. Chen, H. Zhang and H. Xia, *Proc. Natl. Acad. Sci. USA*, 2021, **118**, e2102310118.
- S6. C. Zhu, S. Li, M. Luo, X. Zhou, Y. Niu, M. Lin, J. Zhu, Z. Cao, X. Lu, T. Wen, Z. Xie, P. v. R. Schleyer and H. Xia, *Nat. Chem.*, 2013, **5**, 698–703.
- S7. L. Chen, L. Lin, A. R. Nath, Q. Zhu, Z. Chen, J. Wu, H. Wang, Q. Li, W.-F. Lin, J. Zhu and H. Xia, *Proc. Natl. Acad. Sci. USA*, 2023, **120**, e2215900120.
- S8. S. Lehtola, C. Steigemann, M. J. T. Oliveira and M. A. L. Marques, *SoftwareX*, 2018, **7**, 1–5.
- S9. Y. J. Franzke, C. Holzer, J. H. Andersen, T. Begušić, F. Bruder, S. Coriani, F. Della Sala, E. Fabiano, D. A. Fedotov, S. Fürst, S. Gillhuber, R. Grotjahn, M. Kaupp, M. Kehry, M. Krstić, F. Mack, S. Majumdar, B. D. Nguyen, S. M. Parker, F. Pauly, A. Pausch, E. Perlt, G. S. Phun, A. Rajabi, D. Rappoport, B. Samal, T. Schrader, M. Sharma, E. Tapavicza, R. S. Treß, V. Voora, A. Wodyński, J. M. Yu, B. Zerulla, F. Furche, C. Hättig, M. Sierka, D. P. Tew and F. Weigend, *J. Chem. Theory Comput.*, 2023, **19**, 6859–6890.
- S10. Y. J. Franzke and C. Holzer, *J. Chem. Phys.*, 2023, **159**, 184102.
- S11. K. G. Dyall, *Theor. Chim. Acta*, 2004, **112**, 403–409.
- S12. A. Klamt and G. Schüürmann, *J. Chem. Soc., Perkin Trans. 2*, 1993, 799–805.
- S13. A. Schäfer, A. Klamt, D. Sattel, J. C. W. Lohrenz and F. Eckert, *Phys. Chem. Chem. Phys.*, 2000, **2**, 2187–2193.
- S14. *SBDS database*, <https://sdb.sdb.aist.go.jp> (National Institute of Advanced Industrial Science and Technology, assessed 08.02.2024).
- S15. A. E. Reed, R. B. Weinstock and F. Weinhold, *The Journal of Chemical Physics*, 1985, **83**, 735–746.
